## Differential Effects of Halothane and Thiopental on Surfactant Protein C Messenger RNA In Vivo and In Vitro in Rats

Catherine Paugam-Burtz, M.D.,\* Serge Molliex, M.D., Ph.D.,† Bernard Lardeux, Ph.D.,‡ Corinne Rolland, T.A.,§, Michel Aubier, M.D.,|| Jean-Marie Desmonts, M.D.,# Bruno Crestani, M.D., Ph.D.\*\*

**Background:** Pulmonary surfactant is a complex mixture of proteins and phospholipids synthesized by alveolar type II cells. Volatile anesthetics have been shown to reduce surfactant phospholipid biosynthesis by rat alveolar type II cells. Surfactant-associated protein C (SP-C) is critical for the alveolar surfactant functions. Our goal was to evaluate the effects of halothane and thiopental on SP-C messenger RNA (mRNA) expression *in vitro* in rat alveolar type II cells and *in vivo* in mechanically ventilated rats.

**Methods:** *In vitro*, freshly isolated alveolar type II cells were exposed to halothane during 4 h (1, 2, 4%) and 8 h (1%), and to thiopental during 4 h (10, 100  $\mu$ M) and 8 h (100  $\mu$ M). *In vivo*, rats were anesthetized with intraperitoneal thiopental or inhaled 1% halothane and mechanically ventilated for 4 or 8 h. SP-C mRNA expression was evaluated by ribonuclease protection assay.

**Results:** *In vitro*, 4-h exposure of alveolar type II cells to thiopental 10 and 100  $\mu$ M increased their SP-C mRNA content to 145 and 197%, respectively, of the control values. In alveolar type II cells exposed for 4 h to halothane 1, 2, and 4%, the SP-C mRNA content increased dose-dependently to 160, 235, and 275%, respectively, of the control values. *In vivo*, in mechanically ventilated rats, 4 h of halothane anesthesia decreased the

lung SP-C mRNA content to 53% of the value obtained in control (nonanesthetized, nonventilated) animals; thiopental anesthesia increased to 150% the lung SP-C mRNA content.

**Conclusions:** These findings indicate that halothane and thiopental used at clinically relevant concentrations modulate the pulmonary SP-C mRNA content in rats. *In vivo*, the additive role of mechanical ventilation is suggested. (Key words: Lung; pneumocytes, volatile anesthetics.)

PULMONARY surfactant is a complex mixture of proteins and phospholipids synthesized by alveolar type II (ATII) epithelial cells. It reduces lung alveolar surface tension, maintains alveolar fluid balance, and possibly exhibits host-defense properties. Although the phospholipid makeup of surfactant is critical to its functional integrity, surfactant-associated proteins, particularly the hydrophobic surfactant-associated protein C (SP-C), have been recognized increasingly as conferring the properties of rapid surface adsorption and surface-tension reduction to phospholipids during dynamic compression.<sup>1,2</sup> SP-C, which is synthesized exclusively by ATII cells,<sup>3</sup> facilitates the adsorption and the spreading of the phospholipids to form the surfactant monolayer<sup>2,4</sup> and enhances *in vitro* the lipid uptake in ATII cells.<sup>5</sup> *In vivo* in animal models of surfactant deficiency<sup>6,7</sup> and in preterm infants with respiratory distress syndrome,<sup>8</sup> bovine derived exogenous surfactants that contain SP-C are more effective at decreasing the rates of barotrauma and mortality.

During inhalation anesthesia, lung alveolar epithelium is exposed directly to volatile anesthetics. Recently, potentially deleterious effects of halothane on the surfactant metabolism of ATII cells have been described. Our group has shown that halothane at clinically relevant concentrations reduces surfactant phospholipid biosynthesis by rat ATII cells *in vitro*,<sup>9</sup> whereas intravenous anesthetic agents such as thiopental have no effect on phospholipid surfactant metabolism.<sup>10</sup> These results highlight differential effects of anesthetic agents on

\* Associate Professor of Anesthesiology, Service d'Anesthésie-Réanimation Chirurgicale, Hôpital Bichat, and Unité INSERM 408, Faculté X. Bichat.

† Professor of Anesthesiology, Unité INSERM 408, Faculté X. Bichat.

‡ Physical Doctor, Unité INSERM 327, Faculté X. Bichat.

§ Research Associate, Unité INSERM 408, Faculté X. Bichat.

|| Professor of Pneumology, Unité INSERM 408, Faculté X. Bichat.

# Professor of Anesthesiology, Service d'Anesthésie-Réanimation Chirurgicale, Hôpital Bichat.

\*\* Professor of Pneumology, Unité INSERM 408, Faculté X. Bichat.

Received from Unité Inserm 408, Faculté X. Bichat, Paris, France. Submitted for publication December 22, 1999. Accepted for publication April 24, 2000. Supported by a grant from Assistance Publique-Hôpitaux de Paris, Paris, France.

Address reprint requests to Dr. Paugam-Burtz: Department of Anesthesiology, Hôpital Bichat, 46, Rue Henri Huchard, 75877 Paris cedex 18. Address electronic mail to: catherine\_paugam@hotmail.com

Individual article reprints may be purchased through the Journal Web site, www.anesthesiology.org

physiologic functions of ATII cells. Whether or not pulmonary SP-C is affected by volatile anesthetics remains to be determined. The present study was designed to assess the effects of halothane and thiopental on surfactant SP-C messenger RNA (mRNA) expression, *in vitro* in freshly isolated ATII cells and *in vivo* in mechanically ventilated rats.

## Materials and Methods

Animals were treated according to the guidelines of the French Institut National de la Santé et de la Recherche Médicale (INSERM) for laboratory care of animals.

### Materials

Adult male pathogen-free Sprague-Dawley rats (200–220g) (Charles Rivers Breeders, St Aubin les Elbeuf, France) were used within 4 days of delivery. Animals were killed by exsanguination under general anesthesia. Halothane was purchased from Trofield (London, United Kingdom). Sodium thiopental was purchased from Spécia (Paris, France). TEMED, ammonium persulfate, and guanidine thiocyanate were from Sigma (La Verpillère, France). [ $\alpha$ - $^{32}$ P]UTP ( $128 \times 10^{11}$  Bq/mmol) was from Amersham (Les Ulis, France). RNase-free DNase I and ribonucleases A and T1 were supplied from Boehringer (Mannheim, Germany). Acrylamide-bisacrylamide, phenol, urea, and proteinase K were from Appligene (Illkirch, France). BSU36I restriction enzyme was from New England Biolabs (Beverly, MA). Tissue culture media, supplements, and fetal bovine serum were from Gibco BRL Life Technologies (Cergy Pontoise, France). Tissue culture plastic was from Costar (Cambridge, MA).

### In Vitro Study

Alveolar type II cells were isolated from rat lungs by elastase dissociation and purified by differential adherence to plastic as previously described.<sup>9,11</sup> Cell isolation yield per rat and cellular viability (assessed by the Trypan blue exclusion test) were  $25 \pm 1.10^6$  and  $95 \pm 5\%$  (mean  $\pm$  SD,  $n = 30$ ). In this preparation, about 60% of the cells are ATII cells.<sup>11</sup> For each experiment, freshly isolated cells from four different rats were pooled and immediately plated in 10-cm diameter cell culture plastic dishes ( $20 \times 10^6$  cells/dish) with 20 ml of Dulbecco's modified Eagle's medium containing 10% fetal bovine serum,  $10^5$  U/l penicillin, 100 mg/l streptomycin, and 0.25 mg/l amphotericin B; the cells then were exposed to the different experimental conditions (control, halo-

thane, or thiopental). Each experiment was performed three times.

Freshly isolated ATII cells were exposed to halothane using a 12-l airtight Lwoff chamber (Lequeux, Paris, France) as previously described.<sup>9,12</sup> The chamber atmosphere was kept continuously saturated with water at 37°C. In preliminary experiments, we observed that over an 8-h period the different culture conditions used in our experiments did not influence SP-C mRNA expression by ATII cells, the expression being similar in standard incubator and in the sealed chamber flushed with a 95% air–5% CO<sub>2</sub> mixture. Halothane was vaporized by directing a 95% air–5% CO<sub>2</sub> mixture at 5 l/min through a calibrated Fluotec Mark II vaporizer (Abbott Paris, France) placed at the entrance of the chamber. Halothane concentration was monitored at the chamber exit port using a halogen monitor (Capnomac Datex, Helsinki, Finland). The effects of halothane on SP-C mRNA expression of ATII cells were assessed during 4-h exposure with various halothane concentrations (1, 2, and 4%) and during 8-h exposure with 1% halothane.

Exposure of freshly isolated ATII cells to thiopental was achieved by addition of sodium thiopental (molecular weight: 264) to the culture medium (final concentrations: 10 and 100  $\mu$ M). The cell plates were returned to a standard 95% air–5% CO<sub>2</sub> incubator for the desired period of time (4 or 8 h). We chose thiopental concentrations consistent with those that may be observed in plasma in clinical practice.<sup>13,14</sup>

For each exposure condition, a control point was obtained simultaneously with ATII cells cultured in a standard 95% air–5% CO<sub>2</sub> incubator without anesthetic exposure. At the end of each experiment, supernatants and adherent cells were frozen immediately in liquid nitrogen and stored at  $-80^\circ\text{C}$  until RNA extraction.

### In Vivo Study

In all animals (adult rats weighting 200–220 g), anesthesia was induced initially with ether vapor, and then the trachea was cannulated with a 14-gauge catheter. Animals were assigned randomly for maintenance of anesthesia to inhaled 1% halothane or intraperitoneal injection of thiopental. Halothane was vaporized at 1% inspired concentration (one minimal alveolar concentration for rats)<sup>15</sup> monitored by a halogen monitor (Capnomac Datex). Rats then were ventilated for 4 and 8 h ( $n = 6$  animals for each duration). Thiopental-anesthetized rats received a first intraperitoneal injection of thiopental (12.5 mg/100 g weight). Three animals ventilated

## EFFECTS OF HALOTHANE AND THIOPENTAL ON SP-C mRNA

during 8 h needed extra doses of thiopental (3 mg/100 g weight) at the 6th h of ventilation.

Ventilator strategies were identical in all animals and consisted of a fraction of inspired oxygen of 0.21, a tidal volume of 3 ml, and a respiratory rate of 60 breaths/min without positive end-expiratory pressure. A rectal temperature probe was positioned for core temperature monitoring, and temperature was maintained with a heating pad. After 4 or 8 h of ventilation, rats were killed by aorta transection, and the lungs were removed from the thorax and immediately frozen in liquid nitrogen and stored at  $-80^{\circ}\text{C}$  until total pulmonary RNA extraction.

Six rats anesthetized with ether vapor and immediately killed by section of the abdominal aorta after trachea cannulation without additional anesthesia or mechanical ventilation, were used as a control group.

#### Ribonuclease Protection Assay

Total RNA from lung and cultured ATII cells was isolated using RNAPlus (Bioprobe, Montreuil, France) according to the instructions of the manufacturer. SP-C gene expression by rat ATII cells was evaluated by ribonuclease protection assay on total RNA solubilized in guanidine thiocyanate.<sup>16</sup> Total RNA was cohybridized with  $\beta$ -actin and SP-C RNA probes. A 243-nucleotide SP-C riboprobe was obtained from SP-C complementary DNA inserts subcloned into PGEM 4Z phagemid vector.<sup>17</sup> Riboprobe synthesis was performed in the presence of [ $\alpha$ - $^{32}\text{P}$ ]UTP ( $128 \times 10^{11}$  Bq/mmol,  $5 \times 10^4$  Bq) and T7 RNA polymerase after linearization of the vector by BSU36I digestion. The 144-nucleotide  $\beta$ -actin riboprobe was synthesized from a BSU36I rat complementary DNA insert into PGEM 3Z.

For hybridization in guanidine thiocyanate, 10  $\mu\text{l}$  of appropriate dilution of RNA preparations was mixed with 2  $\mu\text{l}$  of each labeled riboprobe ( $10^5$  counts/min/ $\mu\text{l}$ ). After overnight hybridization at room temperature, the samples were treated with ribonucleases A and T1 and exposed to proteinase K. After extraction with phenol:chloroform:isoamylalcohol, the protected RNA:RNA hybrids were precipitated and loaded on a 6% acrylamide-bisacrylamide urea denaturing gel. Quantitative analysis of radioactive protected bands was performed by direct counting of the gel (InstantImager, Packard, Groningen, The Netherlands). To control for variations in RNA loading, the ratio of the SP-C mRNA signal and the corresponding  $\beta$ -actin mRNA signal was calculated for each sample.<sup>16,18</sup> Expression of  $\beta$ -actin mRNA has been shown to be constant under various conditions, including halothane and thiopental exposure.<sup>18</sup> Relative changes

were expressed versus control (nonexposed) cells or control (nonanesthetized, nonventilated) animals.

#### Statistical Analysis

Results are presented as the mean  $\pm$  SD. *In vivo* results are derived from six animals in each group. For *in vitro* experiments, cells isolated from four rats were pooled and each experimental datum was accompanied by a control datum derived from the same pool of isolated cells. *In vitro* results are derived from at least three independent pools of ATII cells. Comparisons between groups were made using a Kruskal-Wallis nonparametric analysis of variance, followed in case of significance by a Mann-Whitney U test.  $P < 0.05$  was accepted as significant.

## Results

#### In Vitro Study

Exposure of rat ATII cells to halothane at 1, 2, and 4% for 4 h increased the SP-C: $\beta$ -actin mRNA ratio compared with ATII cells cultured in standard conditions for 4 h. The ratio was increased to  $160 \pm 48\%$ ,  $232 \pm 53\%$ , and  $275 \pm 110\%$  with 1, 2, and 4% halothane ( $P < 0.05$  for each comparison *vs.* control value) (fig. 1). The stimulating effect of halothane appeared to be dose-dependent if the SP-C: $\beta$ -actin mRNA ratio was calculated as a function of halothane concentration using a regression analysis ( $P = 0.032$ ,  $r = 0.59$ , SE of the estimate = 15.35).

The culture of ATII cells with thiopental (10 and 100  $\mu\text{M}$ ) for 4 h increased the SP-C: $\beta$ -actin mRNA ratio to

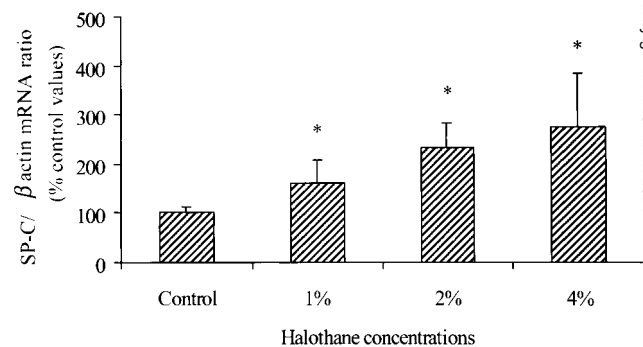

**Fig. 1.** *In vitro* effects of 4-h halothane exposure at various concentrations on surfactant-associated protein C: $\beta$ -actin messenger RNA ratio in rat alveolar type II cells (percentage of control values,  $n = 3$  per condition, mean  $\pm$  SD). \* $P < 0.05$  versus control values. (Alveolar type II cells cultured in standard conditions.)

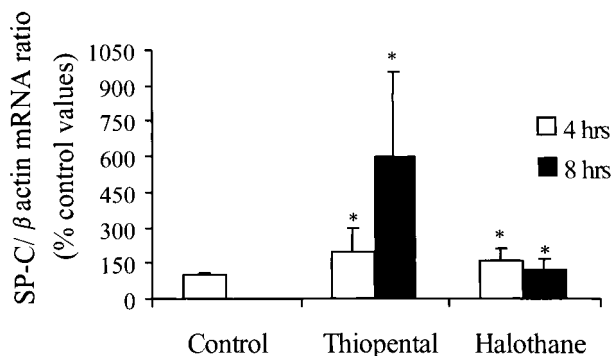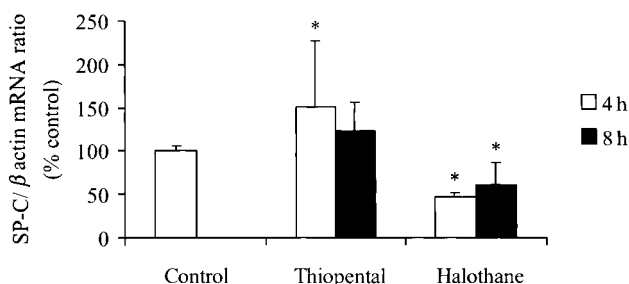



duces some of the usual circumstances of anesthesia in humans. One percent inspired concentration of halothane has been shown to be the minimum alveolar concentration for rats.<sup>15</sup>

In our study, thiopental induced a significant increase in SP-C mRNA content in both the *in vivo* and the *in vitro* experiments. The effects of thiopental on surfactant have not been studied extensively. Ward and Nicholas<sup>20</sup> have shown *in vivo* in rats that thiopental anesthesia inhibits surfactant phospholipid release in the alveolar compartment, leading to an increase in surfactant synthesis. Marota *et al.*<sup>18</sup> have observed that thiopental *in vivo* in rats increases the cerebral content of jun-B mRNA after 120 min of anesthesia. In that study, thiopental did not modify the cerebral  $\beta$ -actin mRNA content. *In vitro*, thiopental administration is associated with a significant increase in mRNA synthesis in hepatocytes.<sup>21</sup> Phenobarbital also has been shown to increase *in vivo* the hepatic  $\alpha_1$ -acid glycoprotein mRNA content. This effect was related to a transcriptional regulation of the gene through a specific phenobarbital responsive element.<sup>22</sup> We speculate that thiopental can increase SP-C mRNA expression through a transcriptional regulation. The variation in SP-C protein lung content induced by the variation in SP-C mRNA content, however, remains undetermined.

*In vitro*, we observed that halothane increased the SP-C mRNA content of ATII cells. Only a few studies have previously reported the effects of halothane on specific mRNA expression. Inhibition of RNA transcription in lymphocytes exposed to halothane for 6 hours has been described *in vitro*.<sup>23</sup> *In vivo*, halothane anesthesia in rats decreases the cerebral jun-B mRNA content,<sup>18</sup> whereas c-fos mRNA content is unchanged and decreases the lung macrophage inflammatory protein-2 mRNA content after an inflammatory challenge.<sup>24</sup> These results highlight a differential effect of halothane on the expression of various mRNAs that could be related to transcriptional or posttranscriptional changes. To our knowledge, however, precise mechanisms of action of halothane have not been elucidated. Surprisingly, we observed opposite findings between *in vivo* and *in vitro* expression of SP-C mRNA exposed to halothane. Halothane produced a significant decrease in lung SP-C mRNA content in mechanically ventilated rats, whereas *in vitro* halothane exposure of ATII cells increased the SP-C mRNA content. Results from *in vivo* experiments reflect effects of both anesthetic agent and mechanical ventilation. Our *in vivo* experimental model does not allow us to differentiate these two effects clearly. Exper-

imental models designed to ventilate mechanically animals without anesthesia are not available. In preliminary experiments, we observed that spontaneously breathing rats anesthetized with halothane and thiopental died within 2 hours because of alveolar hypoventilation and major lung atelectasis. Experimental models of perfused and ventilated isolated lungs could have been useful to individualize the effects of mechanical ventilation on SP-C. These models, however, do not allow for ventilation of the lungs for 4 or 8 hours. Data on effects of mechanical ventilation on surfactant are scarce. Wirtz and Dobbs<sup>25</sup> have shown that the mechanical stretch of ATII cells increases the cytosolic calcium concentration and stimulates the secretion of surfactant phospholipid. In a similar model, Gutierrez *et al.*<sup>26</sup> have demonstrated that mechanical distension of ATII cells resulted in a 20% decrease in the mRNA content of SP-C and a 35% decrease of the surfactant-associated protein B mRNA content. The decrease appeared related to changes at both transcriptional and posttranscriptional levels. These data suggest that mechanical distension induced by mechanical ventilation can reduce the SP-C mRNA content in ATII cells. This effect could explain why halothane induced a mild increase in the SP-C mRNA *in vitro* whereas SP-C mRNA content decreased during halothane anesthesia in mechanically ventilated rats. It also could explain why the increase in the lung SP-C mRNA content after thiopental anesthesia was much less important than the increase observed after *in vitro* exposure of ATII cells to thiopental. Behavior of isolated cultured ATII cells are likely to be different from *in vivo* cells because of loss of cellular interactions *in vitro*. These changes also could account for the discrepancy in results between our two experimental conditions.

The results of this study shows that mechanical ventilation under halothane anesthesia decreases the SP-C mRNA pulmonary content in rats, but thiopental anesthesia in the same conditions increases the SP-C mRNA content. Ventilation-induced injury such as alveolar edema has been recognized recently as one of the potential complications of mechanical ventilation. Surfactant inactivation has been suggested to be one component of various events occurring during ventilation-induced lung injury.<sup>27</sup> Moreover, halothane can alter phosphatidyl secretion in ATII cells.<sup>9</sup> Taken together, these experimental findings suggest potentially additive deleterious effects of volatile anesthetics and mechanical ventilation on the homeostasis of the alveolar space. This might be particularly relevant in patients with acute lung injury. In these particular clinical conditions, surfactant

metabolism is already impaired.<sup>28,29</sup> It remains to be determined whether the variations in SP-C mRNA content induced by anesthetics translate into similar variations in SP-C protein.

Our results suggest a positive effect of halothane and thiopental on the pulmonary SP-C mRNA content in rats AII cells *in vitro*. By contrast, *in vivo* during anesthesia and mechanical ventilation, thiopental and halothane have different effects. Further studies are needed to address the clinical significance of these effects.

The authors thank Dr B. Escoubet, INSERM Unité 416, Faculté Bichat, Paris, for the gift of  $\beta$ -actin probe, and Dr. J. B. Fisher, Department of Medicine, University of Colorado, Denver, Colorado, for the gift of SP-C probe.

## References

- Hawgood S: Pulmonary surfactant apoproteins: A review of protein and genomic structure. *Am J Physiol* 1989; 257:L13-L22
- Taneva S, Keough K: Dynamic surface properties of pulmonary surfactant proteins SP-B and SP-C and their mixtures with dipalmitoylphosphatidylcholine. *Biochemistry* 1994; 33:14660-70
- Pinto R, Hawgood S, Clements J, Benson B, Naidu A, Hamilton R, Wright J: Association of surfactant protein C with isolated alveolar type II cells. *Biochim Biophys Acta* 1995; 1255:16-22
- Kobayashi T, Tashiro K, Yamamoto K, Nitta S, Ohmura S, Suzuki Y: Effects of surfactant proteins SP-B and SP-C on dynamic and static mechanics of immature lungs. *J Appl Physiol* 1997; 83:1849-56
- Horowitz A, Moussavian B, Whitsett J: Roles of SP-A, SP-B, and SP-C in modulation of lipid uptake by pulmonary epithelial cells *in vitro*. *Am J Physiol* 1996; 270:L69-L79
- Ogawa A, Brown L, Schlueter A, Benson B, Clements J, Hawgood S: Lung function, surfactant apoprotein content and level of PEEP in prematurely delivered rabbits. *J Appl Physiol* 1994; 4:1840-9
- Davis A, Jobe A, Häfner D, Ikegami M: Lung function in premature lambs and rabbits treated with a recombinant SP-C surfactant. *Am J Respir Crit Care Med* 1998; 157:553-9
- Halliday H: Synthetic or natural surfactant: The case for natural surfactant. *J Perinat Med* 1996; 24:417-26
- Molliex S, Crestani B, Dureuil B, Bastin J, Rolland C, Aubier M, Desmonts J-M: Effects of halothane on surfactant biosynthesis by rat alveolar type II cells in primary culture. *ANESTHESIOLOGY* 1994; 81:668-76
- Molliex S, Rolland C, Crestani B, Dureuil B, Aubier M, Desmonts J: Differential effects of isoflurane and i.v. anaesthetic agents on metabolism of alveolar type II cells. *Br J Anaesth* 1999; 82:767-9
- Crestani B, Rolland C, Petiet A, Colas-Linhart N, Aubier M: Cell surface carbohydrates modulate neutrophil adherence to alveolar type II cells *in vitro*. *Am J Physiol* 1993; 264:L391-400
- Molliex S, Dureuil B, Aubier M, Friedlander G, Desmonts J-M, Clerici C: Halothane decreases Na,K-ATPase, and Na channel activity in alveolar type II cells. *ANESTHESIOLOGY* 1998; 88:1606-13
- Lecharny J, Salord F, Henzel D, Desmonts J, Mantz J: Effects of thiopental, halothane and isoflurane on the calcium-dependent and independent release of GABA from striatal synaptosomes in the rat. *Brain Res* 1995; 670:308-12
- Franks N, Lieb W: Molecular and cellular mechanisms of general anaesthesia. *Nature* 1994; 367:607-14
- Mazze R, Rice S, Baden J: Halothane, isoflurane and enflurane MAC in pregnant and nonpregnant female and male mice and rats. *ANESTHESIOLOGY* 1985; 62:339-41
- Crestani B, Rolland C, Lardeux B, Fournier T, Bernuau D, Poüs C, Vissuzaine C, Li L, Aubier M: Inducible expression of the  $\alpha$ 1-acid glycoprotein by rat and human type II alveolar epithelial cells. *J Immunol* 1998; 160:4596-605
- Fisher J, Emrie P, Shannon J, Mason R: Nucleotide and deduced amino acid sequence of the hydrophobic surfactant protein SP-C from rat: Expression in alveolar cells and homology with SP-C from other species. *Biochim Biophys Acta* 1989; 995:225-30
- Marota J, Crosby G, Uhl G: Selective effects of pentobarbital and halothane on c-fos and jun-B gene expression in rat brain. *ANESTHESIOLOGY* 1992; 77:365-71
- Haines D, Gillespie D: RNA abundance measured by a lysate RNase protection assay. *Biotechnology* 1992; 12:736-41
- Ward H, Nicholas T: Effect of artificial ventilation and anaesthesia on surfactant turnover in rats. *Respir Physiol* 1992; 87:115-29
- Hardwic J, Schwalm F, Richardson A: The effect of pentobarbital on the transcriptional activity of liver. *Biochem J* 1983; 210:599-606
- Fournier T, Medjoubi N, Lapoumeroulie C, Hamelin J, Elion J, Durand G, Porquet D: Transcriptional regulation of rat  $\alpha$ 1-acid glycoprotein gene by phenobarbital. *J Biol Chem* 1994; 269:27175-80
- Bruce D: Halothane inhibition of RNA and protein synthesis of PHA-treated human lymphocytes. *ANESTHESIOLOGY* 1975; 42:11-4
- Giraud O, Dehoux M, Rolland C, Mantz J, Malas V, Toueg M, Desmonts J-M: Differential effects of halothane and thiopental on the lung inflammatory response after LPS-induced lung injury in the rat (abstract). *ANESTHESIOLOGY* 1998; 89:A1376
- Wirtz H, Dobbs L: Calcium mobilization and exocytosis after one mechanical stretch of lung epithelial cells. *Science* 1990; 250:1266-69
- Gutierrez J, Gonzalez R, Dobbs L: Mechanical distension modulates pulmonary alveolar epithelial phenotypic expression *in vitro*. *Am J Physiol* 1998; 274:L196-202
- Dreyfuss D, Saumon G: Ventilator-induced injury. *Am J Respir Crit Care Med* 1998; 157:294-323
- Günther A, Siebert C, Schmidt R, Ziegler S, Grimminger F, Yabuta M, Temmesfeld B, Walmarth D, Morr H, Serger W: Surfactant alterations in severe pneumonia, acute respiratory distress syndrome, and cardiogenic lung edema. *Am J Respir Crit Care Med* 1996; 153:176-84
- Raymondos K, Leuwer M, Haslam P, Vangerow B, Ensink M, Schürmann W, Hustedt H, Rueckoldt H, Pipenbrock S: Compositional, structural, and functional alterations in pulmonary surfactant in surgical patients after the early onset of systemic inflammatory response syndrome or sepsis. *Crit Care Med* 1999; 27:82-9
